# Supplementary material for: Carbon supported PdNi alloy nanoparticles on SiO2 nanocages with enhanced catalytic performance
Source: Royal Society of Chemistry journal article supplement (doi:10.1039/d0qi00596g), 2020-01-01
Supplement: d0qi00596g1.pdf [file d0qi00596g1.pdf]

## Supporting Information

### Carbon supported PdNi alloy nanoparticles on SiO<sub>2</sub> nanocages with enhanced catalytic performance

Min Zhang<sup>\*a</sup>, Yang Ling,<sup>a</sup> Libin Liu<sup>b\*</sup>, Jingli Xu<sup>a</sup>, Jiaying Li<sup>c</sup>, Qunling Fang<sup>d\*</sup>.

<sup>a</sup> College of Chemistry and Chemical Engineering, Shanghai University of Engineering Science, Shanghai 201620, PR China. E-mail: zhangmin@sues.edu.cn.

<sup>b</sup> School of Chemistry and Pharmaceutical Engineering, Qilu University of Technology (Shandong Academy of Sciences), Jinan 250353, China. E-mail: lbliu@qlu.edu.cn

<sup>c</sup> Institute of Plasma Physics, Chinese Academy of Sciences, P.O. Box 1126, 230031 Hefei, PR China

<sup>d</sup> School of Food and Biological Engineering, Key Laboratory of Metabolism and Regulation for Major Diseases of Anhui Higher Education Institutes, Hefei University of Technology, Hefei, 230009, PR China E-mail: fql.good@hfut.edu.cn

#### Synthesis of SiO<sub>2</sub>@C-AgNi and SiO<sub>2</sub>@C-AuNi

In a typical synthesis, 0.02 g of as-prepared SiO<sub>2</sub>@C-Ni was initially dispersed in 10 mL of ethanol to form a uniform suspension via ultrasonication. Then, 35 mL of aqueous solution containing 3 mg of AgNO<sub>3</sub> was added. Then, this reaction solution was transferred into a 100 mL three-necked flask with mechanical stirring and heated at 65 °C for 3 h. After cooling, the product was collected by centrifugation and washed with water and ethanol for several times before drying at 50 °C overnight. The preparation of SiO<sub>2</sub>@C-AuNi was basically the same as that of SiO<sub>2</sub>@C-AgNi except the AgNO<sub>3</sub> was replaced with HAuCl<sub>4</sub>.

#### Catalytic degradation of methylene blue

The reduction of methylene blue (MB) was carried out in a quartz cuvette at room temperature. 0.2 mg of the as-prepared catalysts was added into a solution with MB (10 mL, 20 mg/L). Then, 10 mg of NaBH<sub>4</sub> was added. The reaction progress was monitored by using a UV-vis absorption spectrometer (UV-2450, Shimadzu) in the scanning range of 450-800 nm at room temperature.

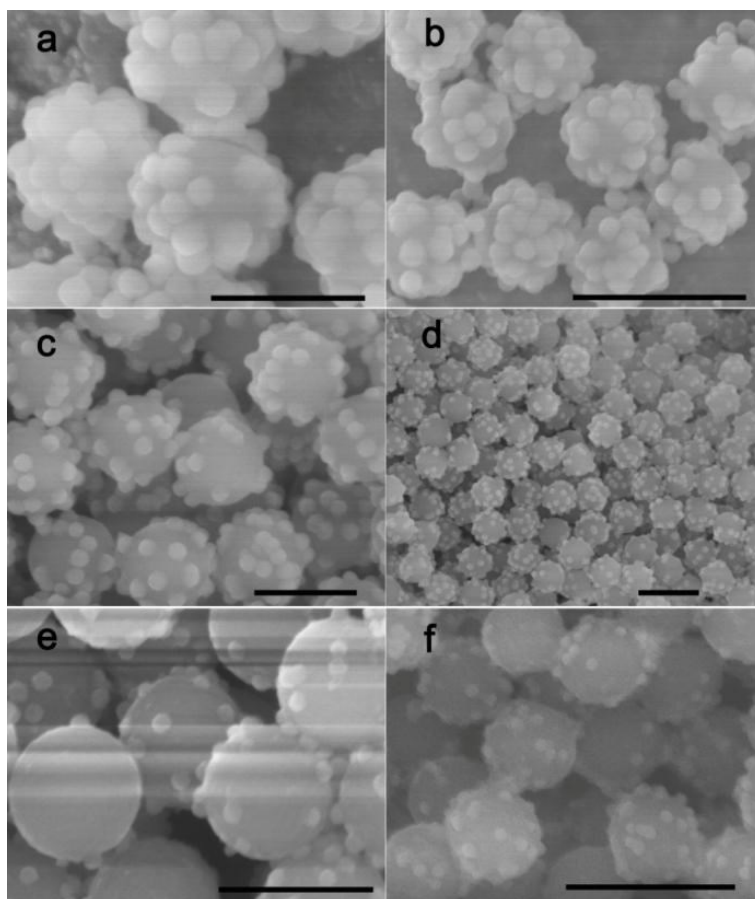

**Fig. S1** SEM image of CPS@SiO<sub>2</sub> with the amount of CPS 25 mg (a, b), 100 mg (c, d), 150 mg (e, f). Scale bars: 300 nm in (a, c, e), and 500 nm in (b, d, f).

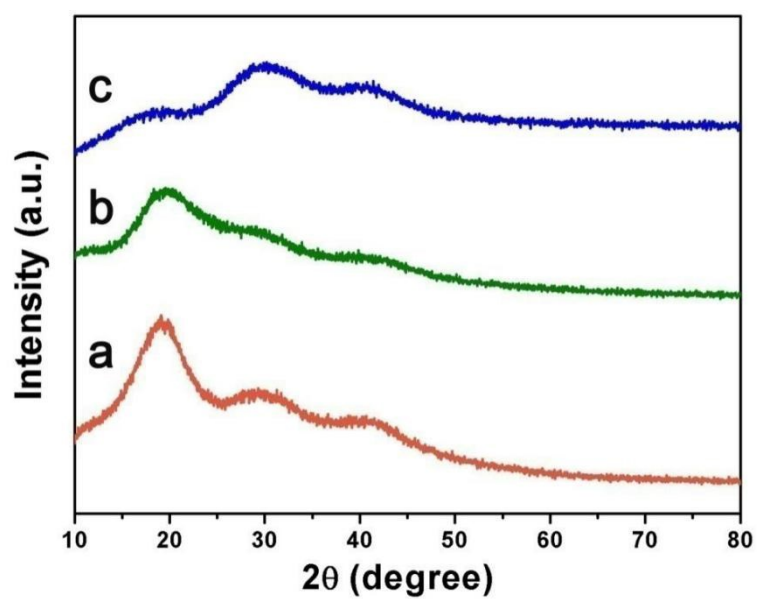

**Fig. S2** XRD diffraction patterns of CPS (a); CPS@SiO<sub>2</sub> (b) and CPS@SiO<sub>2</sub>@RF-Ni<sup>2+</sup> (c).

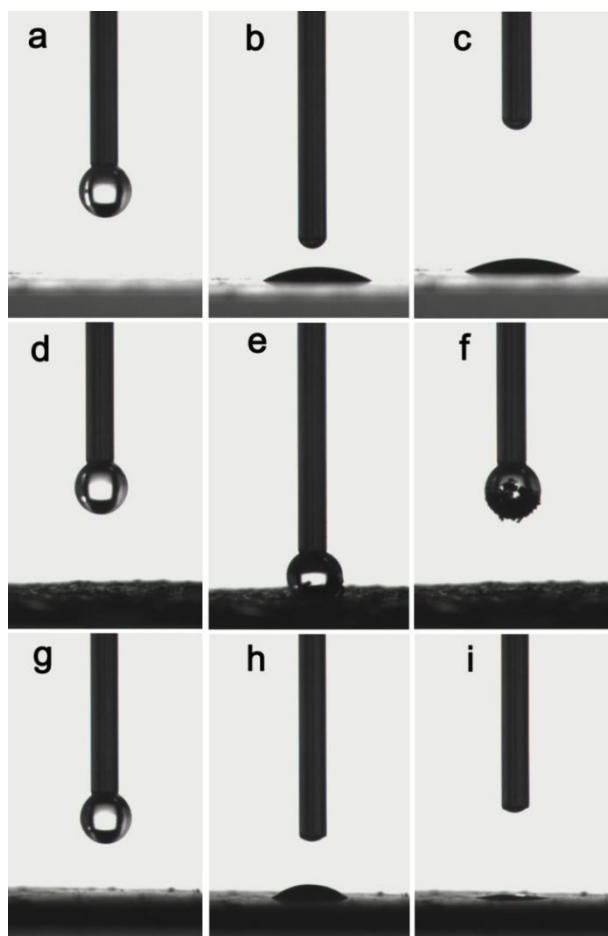

**Fig. S3** Photographs of water droplets on surfaces of CPS@SiO<sub>2</sub>@RF-Ni<sup>2+</sup> (a, b, c), SiO<sub>2</sub>@C-Ni (d, e, f) and SiO<sub>2</sub>@C-PdNi (g, h, i).

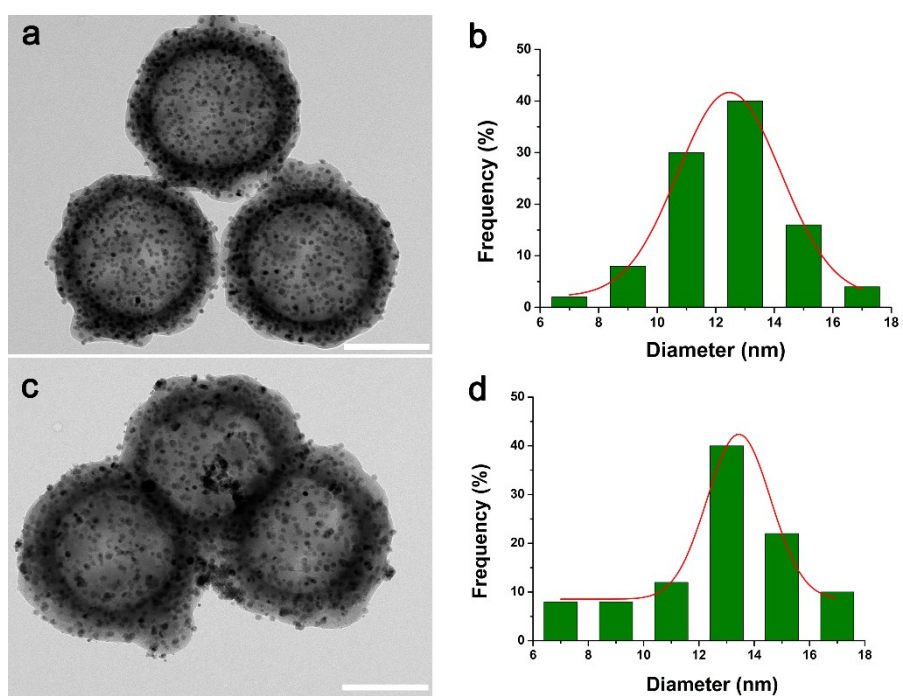

**Fig. S4** (a, c) TEM images of SiO<sub>2</sub>@C-Ni and SiO<sub>2</sub>@C-PdNi respectively; (b, d) the distribution curve of Ni NPs diameter (b, SiO<sub>2</sub>@C-Ni and d, SiO<sub>2</sub>@C-PdNi); Scale bars: 200 nm in (a, c).

Table S1 the average diameter of Ni NPs

| Sample                   | The average diameter of Ni NPs (nm) |
|--------------------------|-------------------------------------|
| SiO <sub>2</sub> @C-Ni   | 12.34                               |
| SiO <sub>2</sub> @C-PdNi | 12.83                               |

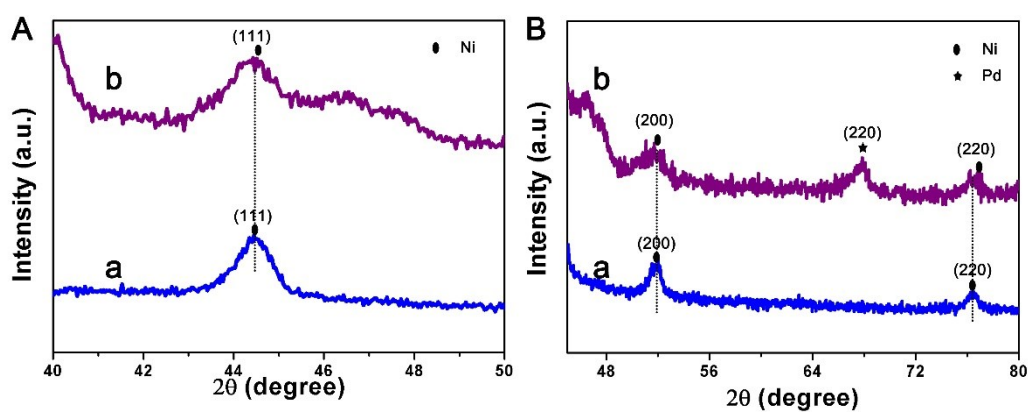

**Fig. S5** Enlarged XRD diffraction patterns of SiO<sub>2</sub>@C-Ni(a) and SiO<sub>2</sub>@C-PdNi (b).

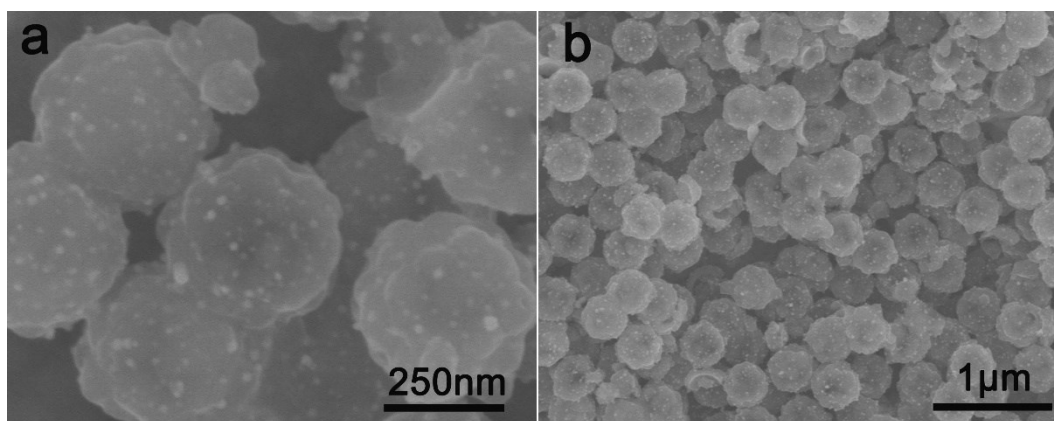

**Fig. S6** SEM images of the SiO<sub>2</sub>@C-PdNi (1mg).

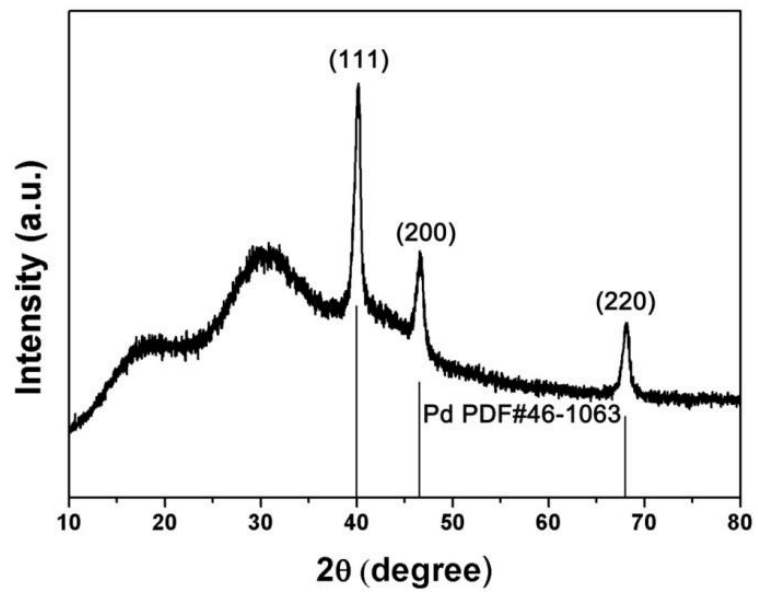

**Fig. S7** XRD diffraction patterns of  $\text{SiO}_2\text{@C-PdNi}$ (10mg).

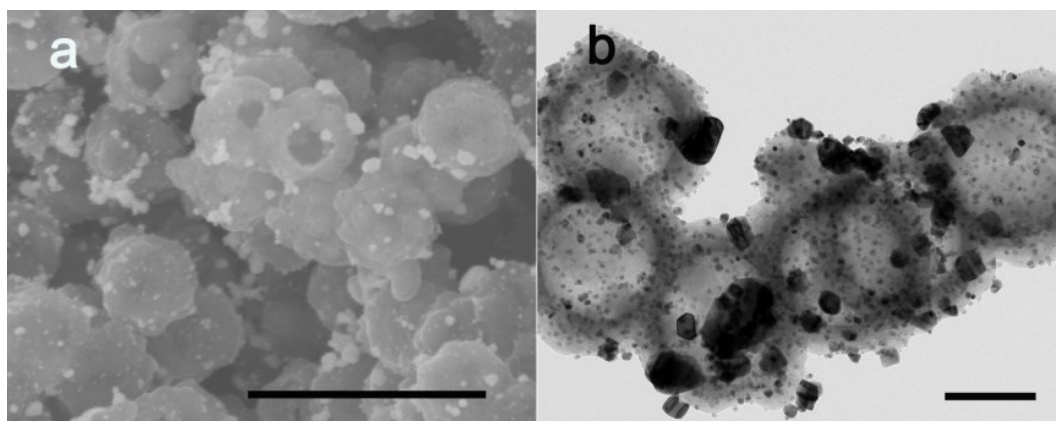

**Fig. S8** SEM and TEM images of  $\text{SiO}_2\text{@C-PdNi}$  (10mg). Scale bars: 1  $\mu\text{m}$  in (a), and 200 nm in (b).

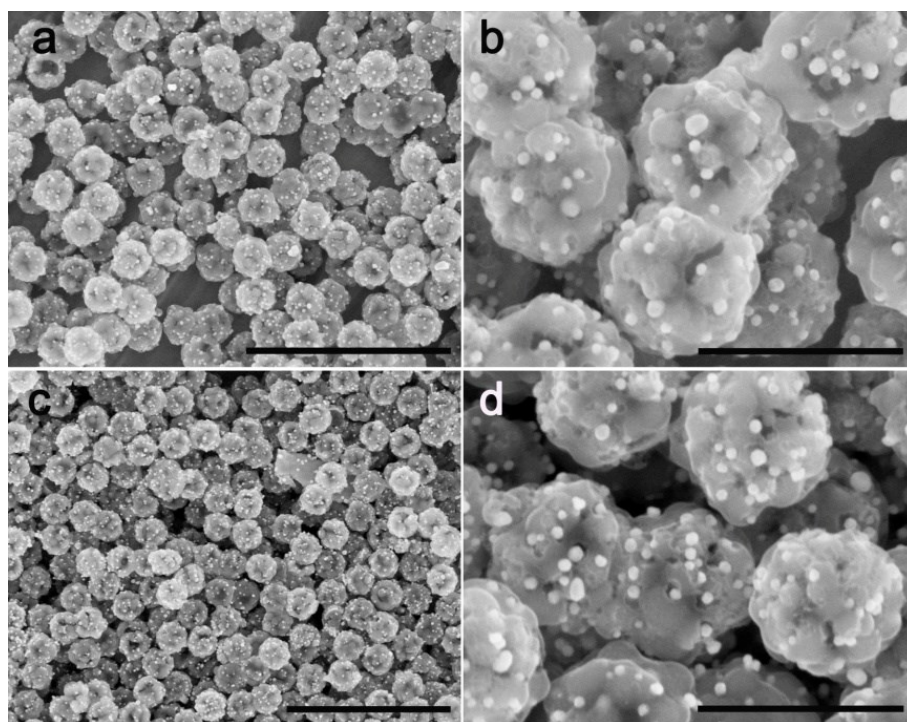

**Fig. S9** SEM images of SiO<sub>2</sub>@C-AgNi (a, b) and SiO<sub>2</sub>@C-AuNi (c, d). Scale bars: 2 μm in (a, c), and 500 nm in (b, d).

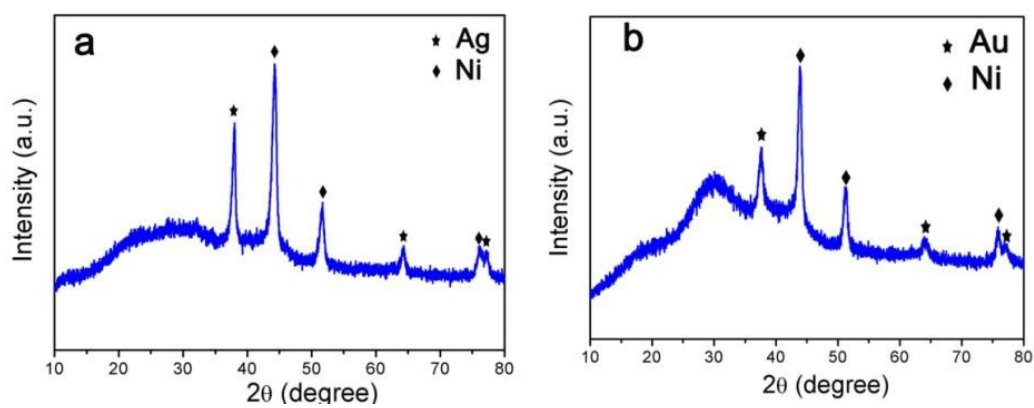

**Fig. S10** XRD diffraction patterns of SiO<sub>2</sub>@C-AgNi(a), SiO<sub>2</sub>@C-AuNi(b). (Ag: JCPDS no. 04-0783, Au: JCPDS no. 04-0784).

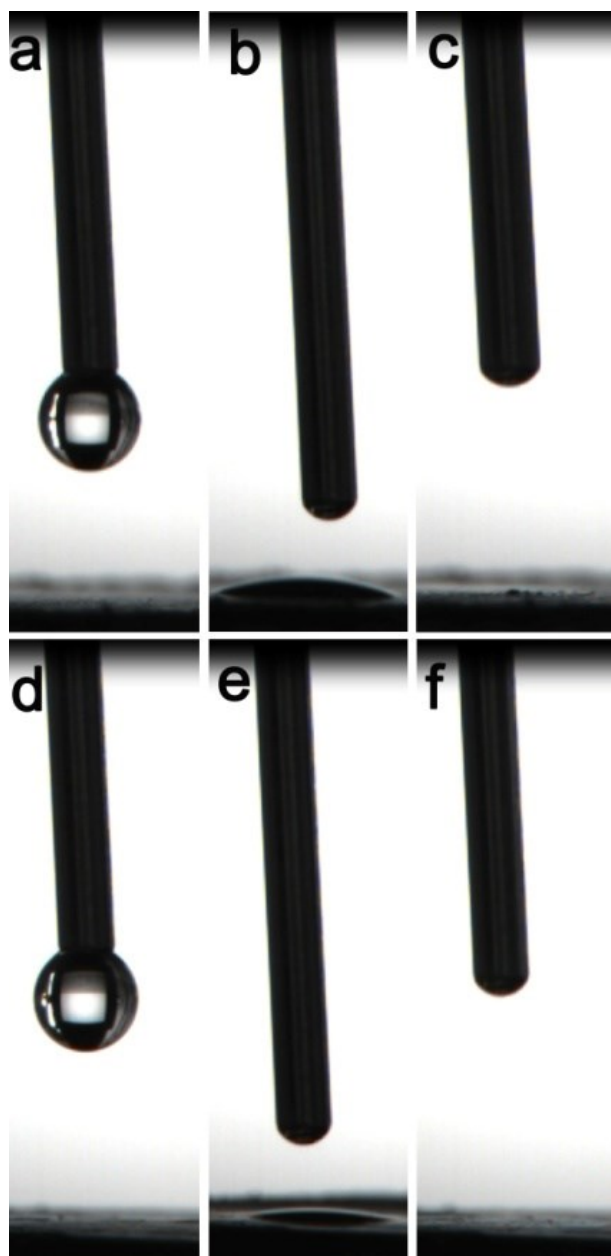

**Fig. S11** Photographs of water droplets on surfaces of SiO<sub>2</sub>@C-AgNi (a, b, c), and SiO<sub>2</sub>@C-AuNi (d, e, f).

---

**Table S2** ICP data of SiO<sub>2</sub>@C-Ni and SiO<sub>2</sub>@C-PdNi

| Catalyst                 | Ni(μg/mg) | Pd (μg/mg) |
|--------------------------|-----------|------------|
| SiO <sub>2</sub> @C-Ni   | 143.6     | -          |
| SiO <sub>2</sub> @C-PdNi | 49.31     | 43.97      |

**Table S3** A full comparison of the activity parameter  $\kappa$  of  $\text{SiO}_2@\text{C-Ni}$  and  $\text{SiO}_2@\text{C-PdNi}$  hollow hybrid composites with other noble metal and no-noble catalysts

| Samples                      | $K (\times 10^{-3} \text{s}^{-1})$ | $\kappa (\times 10^{-3} \text{mg}^{-1} \text{s}^{-1})$ | References |
|------------------------------|------------------------------------|--------------------------------------------------------|------------|
| $\text{SiO}_2@\text{C-Ni}$   | 1.79                               | 62.33                                                  | This work  |
| $\text{SiO}_2@\text{C-PdNi}$ | 4.56                               | 244.42                                                 | This work  |
| Ag/Cu                        | 6.70                               | 74                                                     | 46         |
| Ag/Si                        | 38.41                              | 142.46                                                 | 47         |
| Ni/C                         | 6.26                               | 20.9                                                   | 48         |
| Ag@Pd-Graphene               | 8.67                               | 86.7                                                   | 49         |
| AuPd                         | 5.2                                | 74                                                     | 50         |
| $\text{Cu}_2\text{O-Cu-CuO}$ | 10.4                               | 20.7                                                   | 51         |
| PtPdBi                       | 4.3                                | 287                                                    | 52         |
| Fe@Au-ATPGO                  | 1.4                                | 400                                                    | 53         |

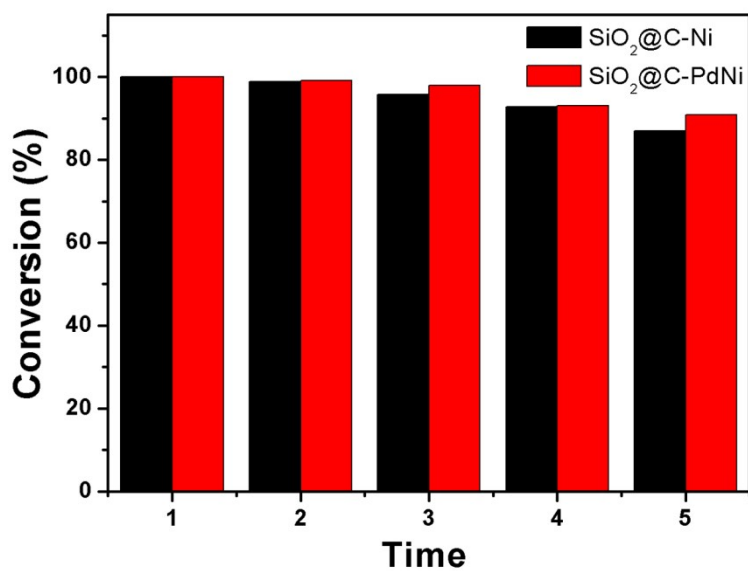

**Fig. S12** cycle test of the  $\text{SiO}_2@\text{C-Ni}$  and  $\text{SiO}_2@\text{C-PdNi}$ .



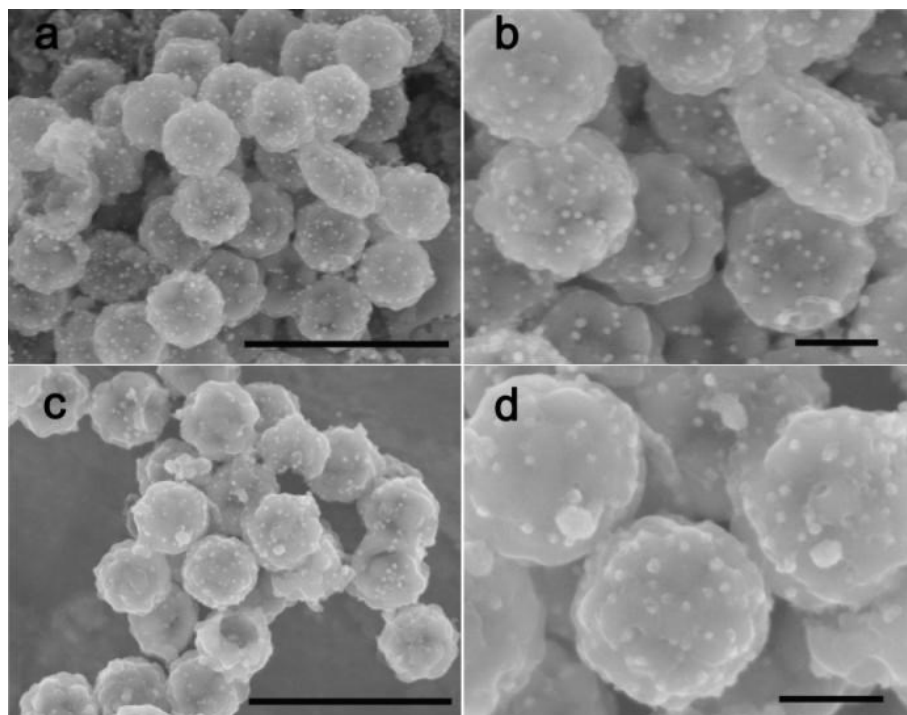

**Fig. S13** SEM images of SiO<sub>2</sub>@C-Ni (a, b) and SiO<sub>2</sub>@C-PdNi (c, d) after five catalytic. Scale bars: 1 μm in (a, c), and 200 nm in (b, d).

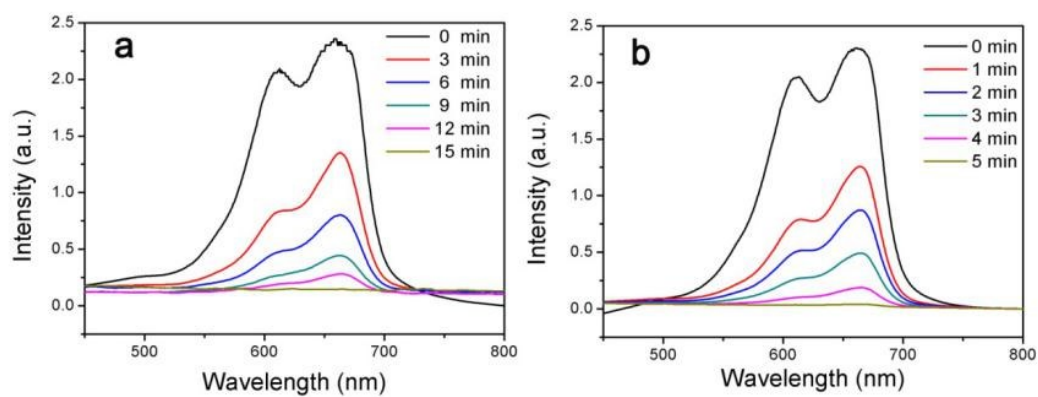

**Fig. S14** UV-Vis absorption spectra of MB during the reduction catalyzed by SiO<sub>2</sub>@C-Ni composite (a) and SiO<sub>2</sub>@C-PdNi (b).

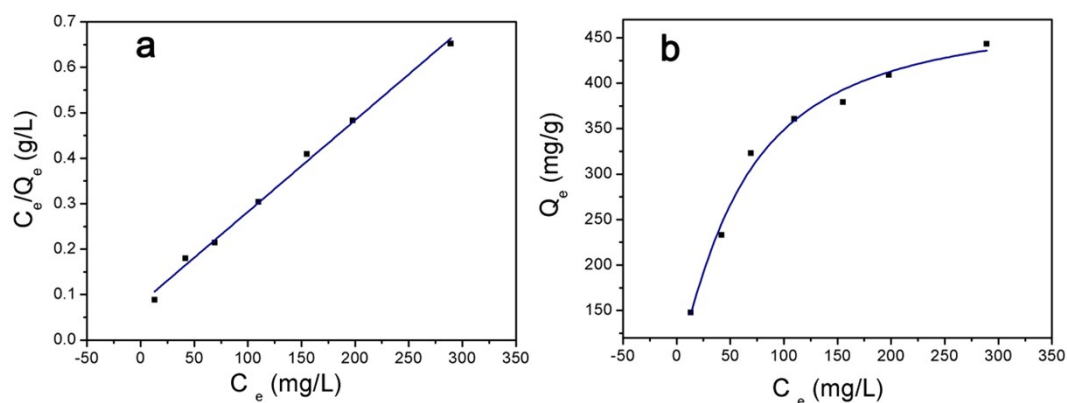

**Fig. S15** Linear fitting of adsorption isotherms plots Langmuir model (a), and adsorption isotherm of BHb on  $\text{SiO}_2@\text{C-Ni}$  the solution containing 20 mM phosphate at pH 7.0-8.0 (b).

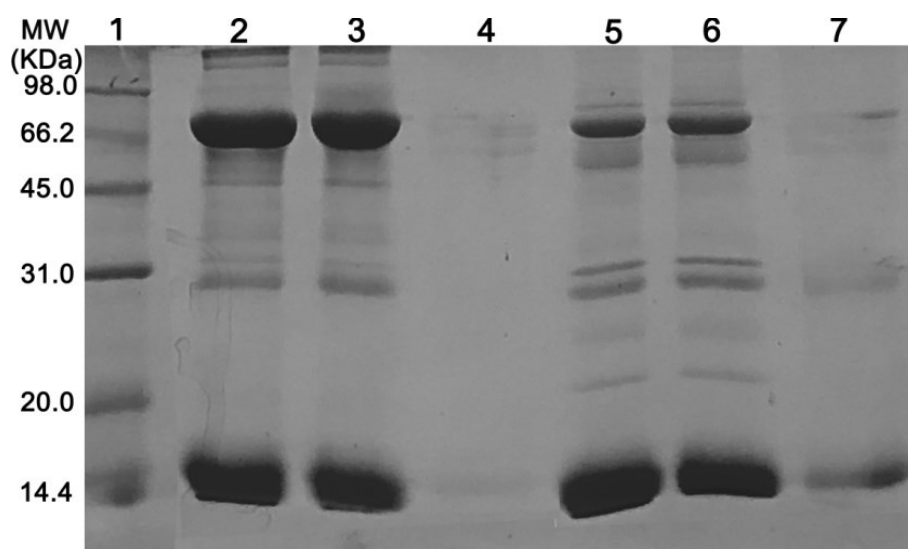

**Fig. S16** SDS-PAGE analysis of adsorption by  $\text{SiO}_2@\text{C-Ni}$  composites from solution. Lane 1, marker; lane 2,  $1 \text{ mg} \cdot \text{mL}^{-1}$  of BHb and BSA binary solution; lane 3, the supernatant BHb and BSA solution after treated with  $\text{SiO}_2@\text{C-Ni}$  composites; lane 4, the eluted BHb and BSA mixture by  $0.2 \text{ g} \cdot \text{mL}^{-1}$  2-methylimidazole solution; lane 5, diluted 100-fold human whole blood; lane 6, supernatant human whole blood solution after treated by  $\text{SiO}_2@\text{C-Ni}$  composites; lane 7, the eluted 100-fold human whole blood by  $0.2 \text{ g} \cdot \text{mL}^{-1}$  2-methylimidazole solution.

46. Y. Sun, F. Zhang, L. Xu, Z. Yin and X. Song, Roughness-controlled copper nanowires and Cu nanowires-Ag heterostructures: synthesis and their enhanced catalysis, *Journal of Materials Chemistry A*, 2014, **2**, 18583-18592.

47. Z. Zhang, C. Shao, Y. Sun, J. Mu, M. Zhang, P. Zhang, Z. Guo, P. Liang, C. Wang and Y. Liu, Tubular nanocomposite catalysts based on size-controlled and highly dispersed silver nanoparticles assembled on electrospun silica nanotubes for catalytic reduction of 4-nitrophenol, *Journal of Materials Chemistry*, 2011, **22**, 1387-1395.
48. Y. Yang, Y. Ren, C. Sun and S. Hao, Facile route fabrication of nickel based mesoporous carbons with high catalytic performance towards 4-nitrophenol reduction, *Green Chemistry*, 2014, **16**, 2273.
49. C. H. Liu, X. Q. Chen, Y. F. Hu, T. K. Sham, Q. J. Sun, J. B. Chang, X. Gao, X. H. Sun and S. D. Wang, One-pot environmentally friendly approach toward highly catalytically active bimetal-nanoparticle-graphene hybrids, *Applied Materials & Interfaces*, 2013, **5**, 5072-5079.
50. J. Zhang, C. Hou, H. Huang, L. Zhang, Z. Jiang, G. Chen, Y. Jia, Q. Kuang, Z. Xie and L. Zheng, Surfactant-concentration-dependent shape evolution of Au-Pd alloy nanocrystals from rhombic dodecahedron to trisoctahedron and hexoctahedron, *Small*, 2013, **9**, 538-544.
51. A. K. Sasmal, S. Dutta and T. Pal, A ternary Cu<sub>2</sub>O-Cu-CuO nanocomposite: a catalyst with intriguing activity, *Dalton transactions*, 2016, **45**, 3139-3150.
52. Y. Y. Shen, Y. Sun, L. N. Zhou, Y. J. Li and E. Yeung, Synthesis of ultrathin PtPdBi nanowire and its enhanced catalytic activity towards p-nitrophenol reduction, *Journal of Materials Chemistry A*, 2014, **2**, 2977-2984.
53. V. K. Gupta, N. Atar, M. L. Yola, Ü. Z and L. Uzun, A novel magnetic Fe@Au core-shell nanoparticles anchored graphene oxide recyclable nanocatalyst for the reduction of nitrophenol compounds, *Water Research*, 2014, **48**, 210-217.
